# Supplementary material for: Healthcare utilization and cost trajectories post-stroke: role of caregiver and stroke factors
Source: PubMed Central journal article supplement (PMC6251229; doi:10.1186/s12913-018-3696-3), 2018-11-22

## Study Participant Flowchart

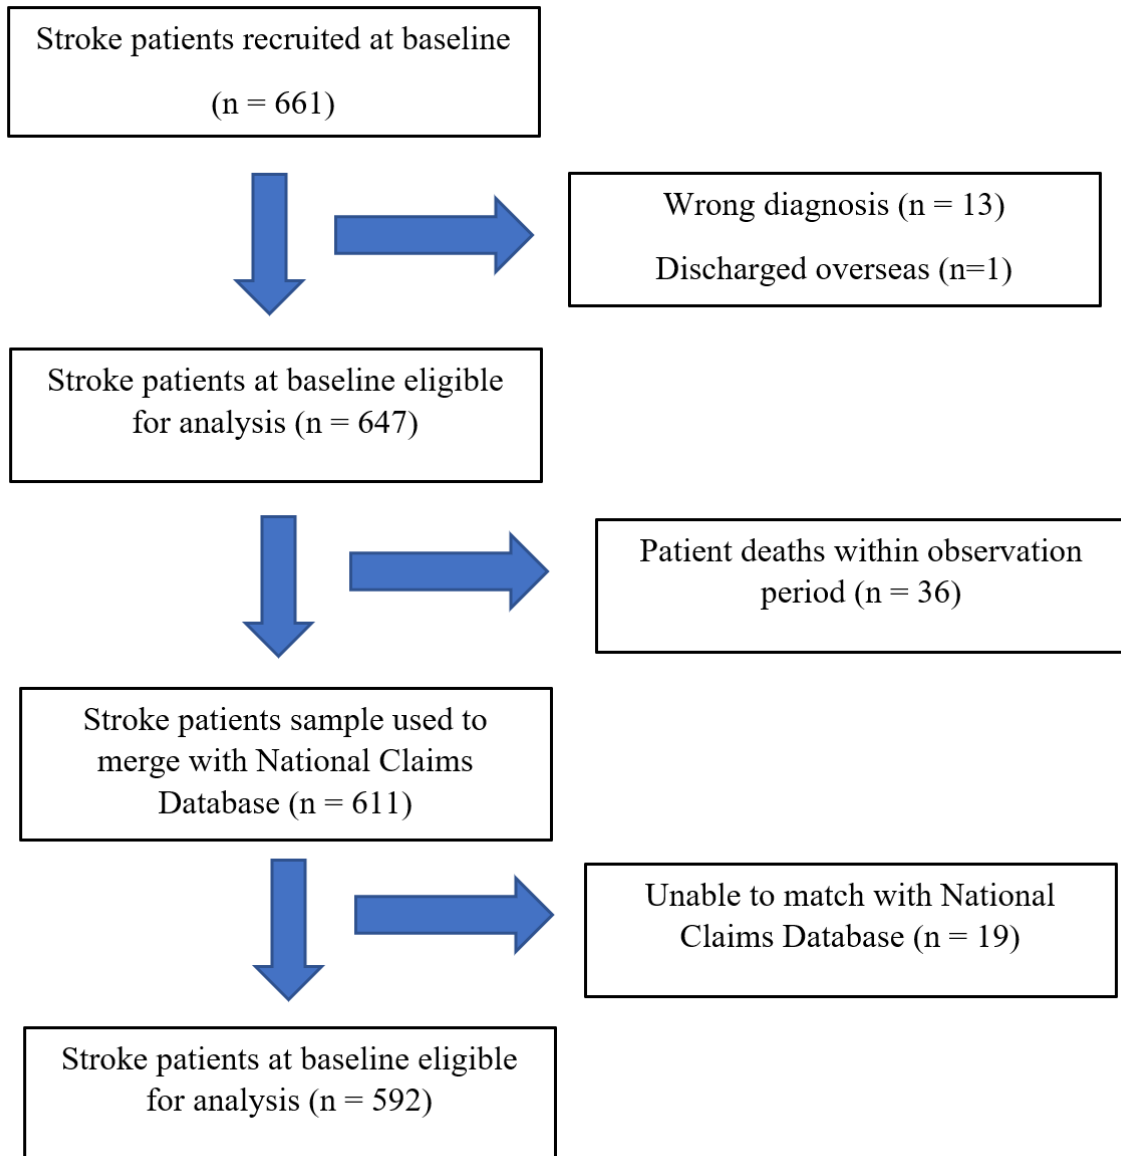

Supplement: 12913_2018_3696_MOESM1_ESM.pdf [file 12913_2018_3696_MOESM1_ESM.pdf]
