# Supplementary material for: Healthcare utilization and cost trajectories post-stroke: role of caregiver and stroke factors
Source: PubMed Central journal article supplement (PMC6251229; doi:10.1186/s12913-018-3696-3), 2018-11-22
Supplement: 12913_2018_3696_MOESM2_ESM.pdf [file 12913_2018_3696_MOESM2_ESM.pdf]

## Sensitivity Analysis

Comparison of baseline socio-demographic and clinical characteristics of stroke patients in the main sample and excluded sample

|                |             | Main Sample<br>(592) | Excluded Sample<br>(69) |              |
|----------------|-------------|----------------------|-------------------------|--------------|
|                |             | N (%)                | N (%)                   | P-value      |
| Age            | < 65 years  | 367 (62.0)           | 33 (47.8)               | <b>0.023</b> |
|                | >= 65 years | 225 (38.0)           | 36 (52.2)               |              |
| Gender         | Male        | 393 (66.4)           | 44 (63.8)               | 0.664        |
|                | Female      | 199 (33.6)           | 25 (36.2)               |              |
| Ethnicity      | Chinese     | 402 (67.9)           | 44 (63.8)               | 0.488        |
|                | Non-Chinese | 190 (32.1)           | 25 (36.2)               |              |
| Religion       | Religion    | 542 (91.7)           | 58 (85.3)               | 0.079        |
|                | No Religion | 49 (8.3)             | 10 (14.7)               |              |
| Marital status | Married     | 413 (69.8)           | 39 (56.5)               | <b>0.025</b> |
|                | Single      | 179 (30.2)           | 30 (43.5)               |              |

|                                                   |                             |            |           |                  |
|---------------------------------------------------|-----------------------------|------------|-----------|------------------|
| Comorbid conditions present                       | No                          | 66 (11.2)  | 10 (14.5) | 0.410            |
|                                                   | Yes                         | 526 (88.8) | 59 (85.5) |                  |
| Ward class                                        | Unsubsidized                | 50 (8.5)   | 2 (4.1)   | 0.282            |
|                                                   | Subsidized                  | 542 (91.5) | 47 (95.9) |                  |
| Stroke Type                                       | Ischemic                    | 518 (87.8) | 58 (87.9) | 0.985            |
|                                                   | Non-ischemic                | 72 (12.2)  | 8 (12.1)  |                  |
| National Institute of Health Stroke Scale (NIHSS) | Mild (0-4)                  | 339 (60.5) | 34 (54.8) | <b>&lt;0.001</b> |
|                                                   | Moderately severe (5-14)    | 196 (35.0) | 20 (32.3) |                  |
|                                                   | Severe (15-24)              | 25 (4.5)   | 6 (9.7)   |                  |
|                                                   | Very severe (25-30)         | 0 (0)      | 2 (3.2)   |                  |
| Barthel Index                                     | Independence (100)          | 130 (24.7) | 12 (20.3) | <b>0.011</b>     |
|                                                   | Slight Dependence (91-99)   | 82 (15.6)  | 4 (6.8)   |                  |
|                                                   | Moderate Dependence (61-90) | 156 (29.7) | 16 (27.1) |                  |
|                                                   | Severe Dependence (21-60)   | 80 (15.2)  | 8 (13.6)  |                  |

|                                                        |                                     |            |           |              |
|--------------------------------------------------------|-------------------------------------|------------|-----------|--------------|
|                                                        | Total Dependence (0-20)             | 78 (14.8)  | 19 (32.2) |              |
| Modified Rankin Scale                                  | No or slight disability (0-2)       | 255 (43.8) | 21 (31.3) | 0.051        |
|                                                        | Moderate or severe disability (3-5) | 327 (56.2) | 46 (68.7) |              |
| Mini-Mental State Examination                          | No cognitive impairment             | 312 (63.2) | 29 (56.9) | 0.336        |
|                                                        | Mild cognitive impairment           | 121 (24.5) | 12 (23.5) |              |
|                                                        | Severe cognitive impairment         | 61 (12.3)  | 10 (19.6) |              |
| Frontal Assessment Battery                             | Mean (SD)                           | 14 (3.9)   | 14 (5.1)  | 0.306        |
| Centre for Epidemiological Studies<br>Depression Scale | Mean (SD)                           | 6.5 (5.5)  | 7.7 (6.1) | 0.124        |
| Discharge to Community Hospital                        | Yes                                 | 139 (23.5) | 20 (29.0) | 0.315        |
|                                                        | No                                  | 452 (76.5) | 49 (71.0) |              |
| Relationship with caregiver                            | None                                | 66 (11.2)  | 6 (8.7)   | <b>0.006</b> |
|                                                        | Spouse                              | 299 (50.8) | 27 (39.1) |              |
|                                                        | Child                               | 151 (25.7) | 29 (42.0) |              |
|                                                        | Sibling                             | 34 (5.8)   | 7 (10.1)  |              |

|  |        |          |       |  |
|--|--------|----------|-------|--|
|  | Others | 38 (6.5) | 0 (0) |  |
|--|--------|----------|-------|--|

Out of 661 stroke patients recruited at baseline, we included 592 for current analysis. (**Refer Additional File 1**) About 52% of the excluded participants (n = 69) comprised of those who died (n = 36) during the follow up period of one year. Therefore, comparing the baseline characteristics of the included versus excluded sample of stroke patients, we found differences in age, marital status, stroke severity measured on NIHSS and relationship with caregiver, which were statistically significant. The excluded sample mainly comprising of those who died during follow up were older, had higher proportion of severe stroke cases, total dependence on Barthel Index and adult-child caregivers.
